# Supplementary material for: ST-Segment Elevation in Patients with Covid-19 — A Case Series
Source: Atypon-hosted journal article supplement (doi:10.1056/nejmc2009020), 2020-04-17

## Supplementary Appendix

This appendix has been provided by the authors to give readers additional information about their work.

Supplement to: Bangalore S, Sharma A, Slotwiner A, et al. ST-segment elevation in patients with Covid-19 — a case series. *N Engl J Med* 2020;382:2478-80. DOI: 10.1056/NEJMc2009020

# Supplementary Appendix

This appendix has been provided by the authors to give readers additional information about their work.

## Contents

|                                                                             |    |
|-----------------------------------------------------------------------------|----|
| Figure S1. Electrocardiogram.....                                           | 2  |
| Figure S2A. Timing of ST-segment elevation, length of stay and outcome..... | 11 |
| Figure S2B. Peak troponin levels.....                                       | 12 |
| Figure S2C. D-dimer levels .....                                            | 13 |
| Figure S3. Coronary angiography.....                                        | 14 |
| Figure S4. Electrocardiogram, echocardiogram and coronary angiography ..... | 19 |

**Figure S1. Electrocardiogram**

Patient #1

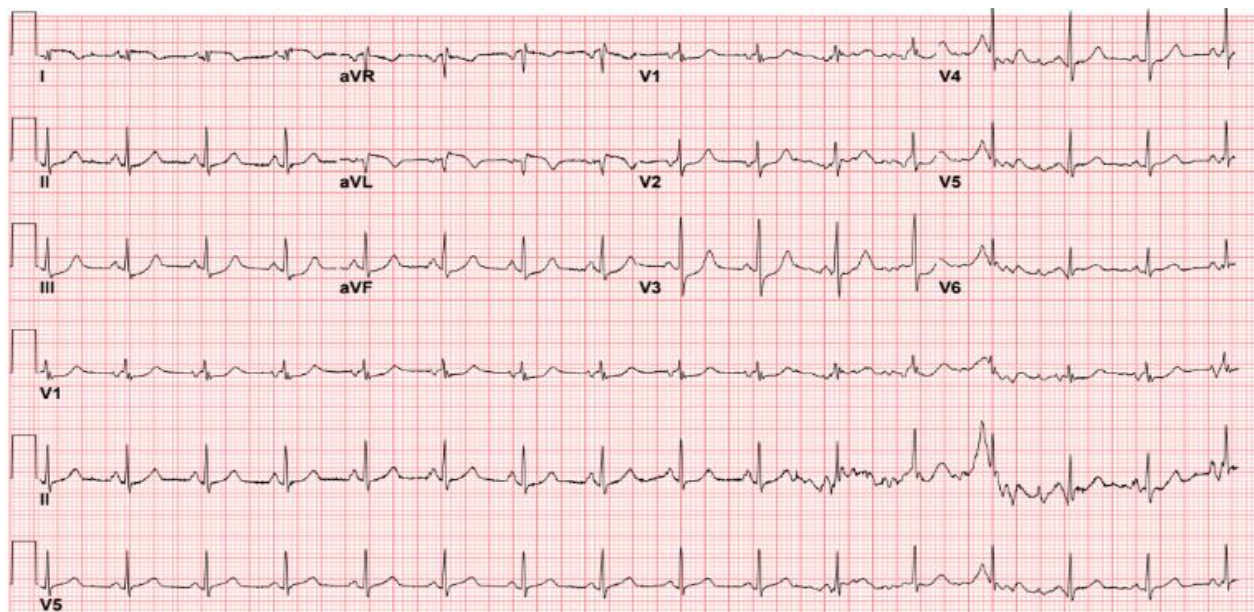

Patient #2

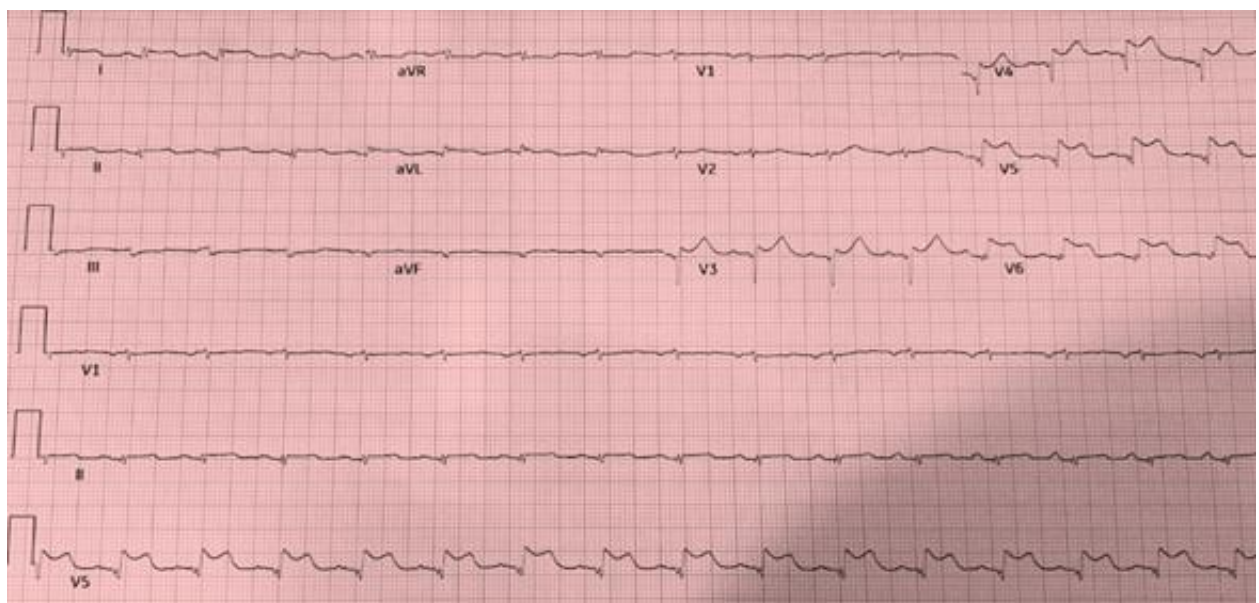

Patient #3

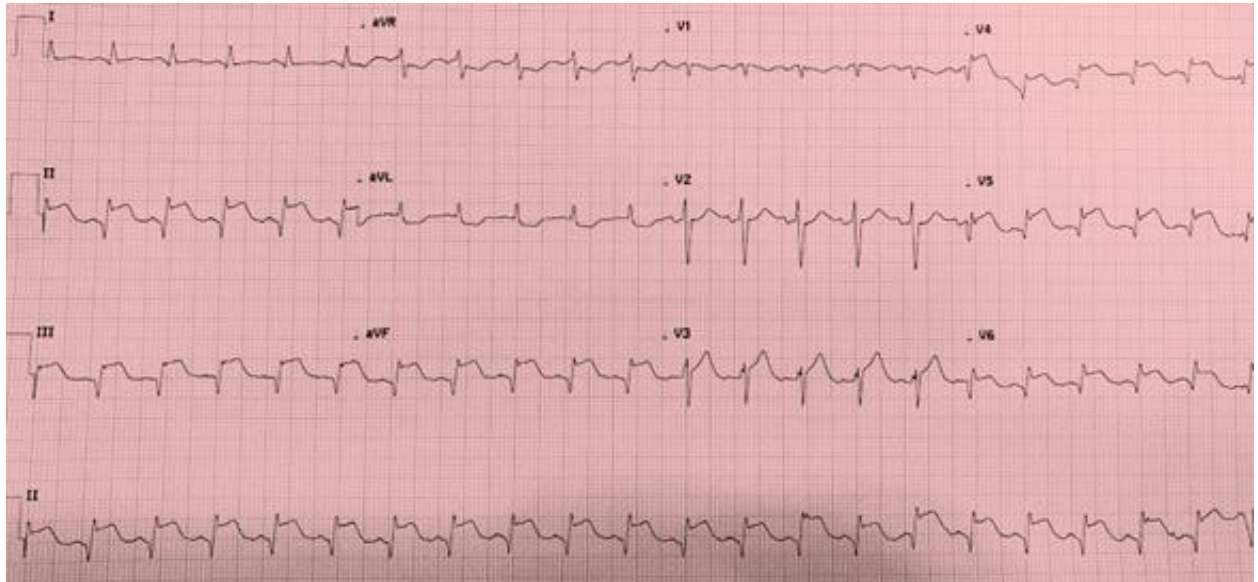

Patient #4

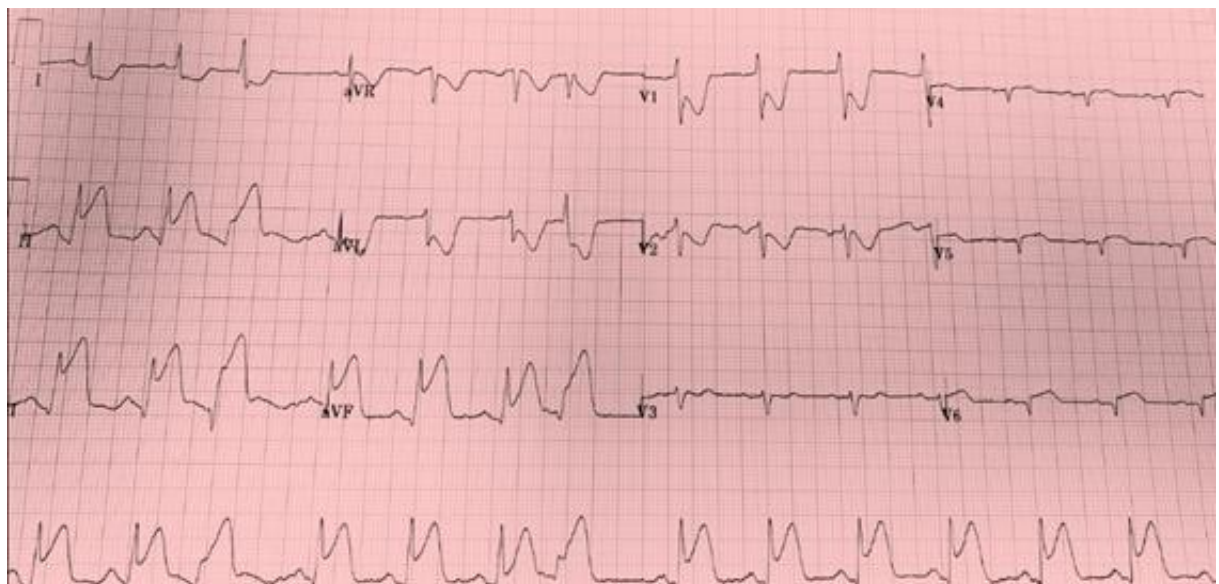



Patient #5

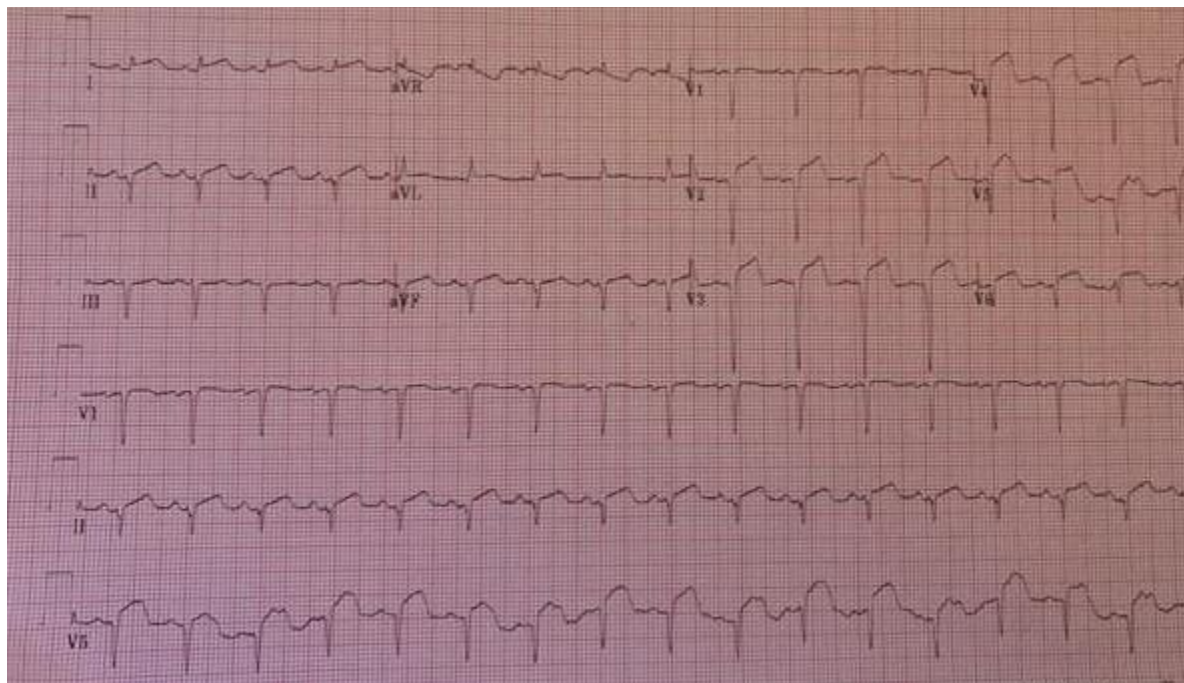

Patient #6

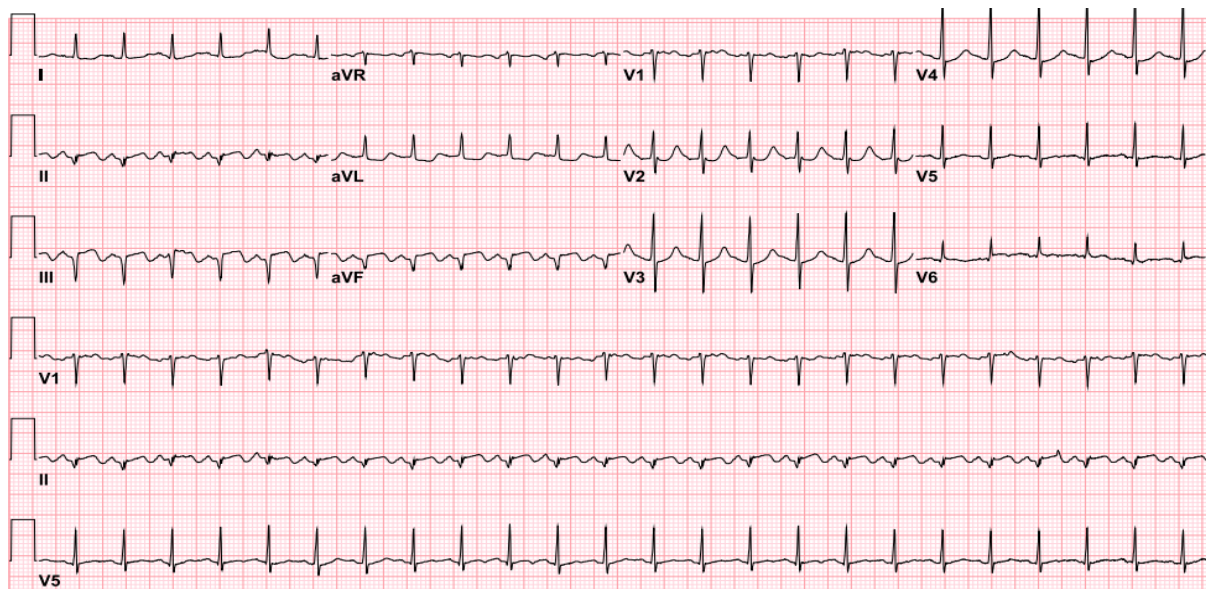

Patient #7

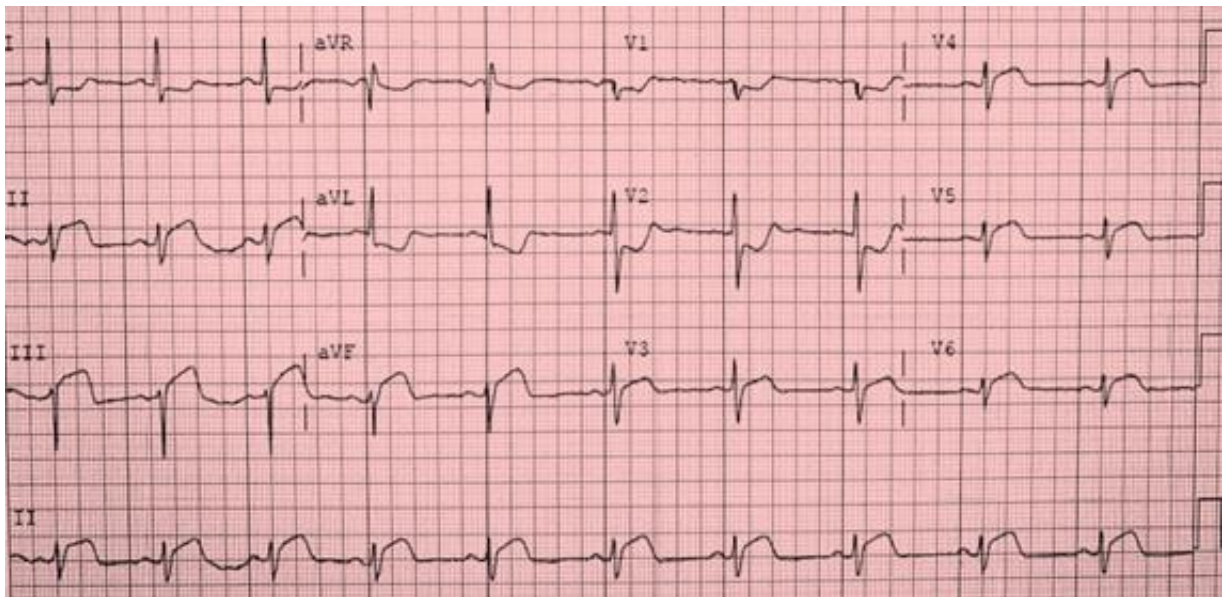

Patient #8

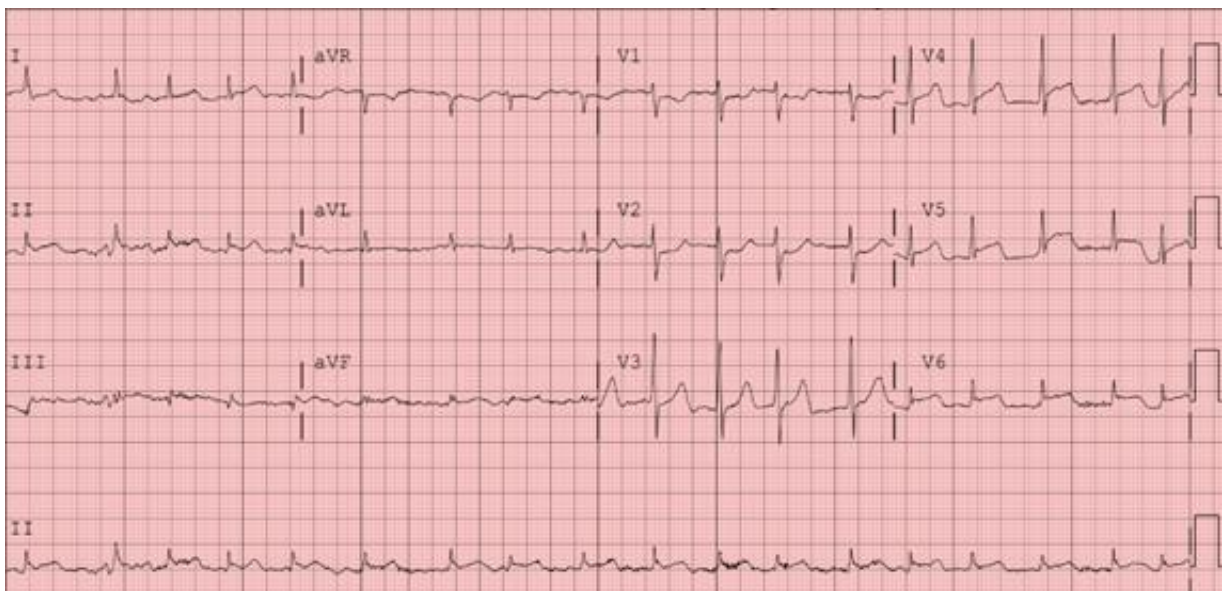



Patient #9

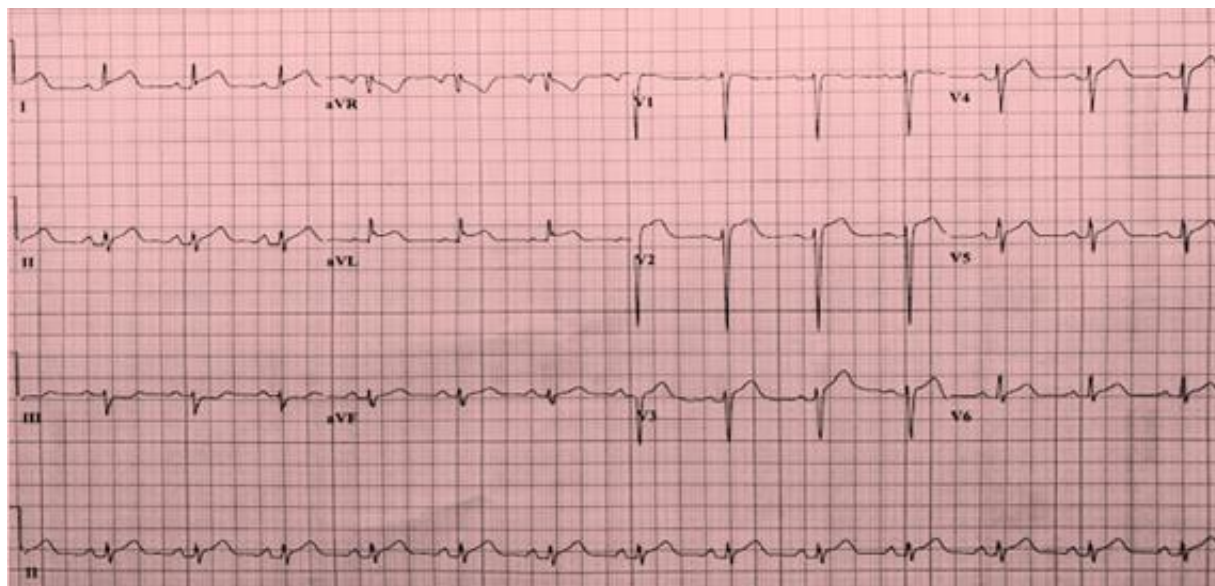

Patient #10

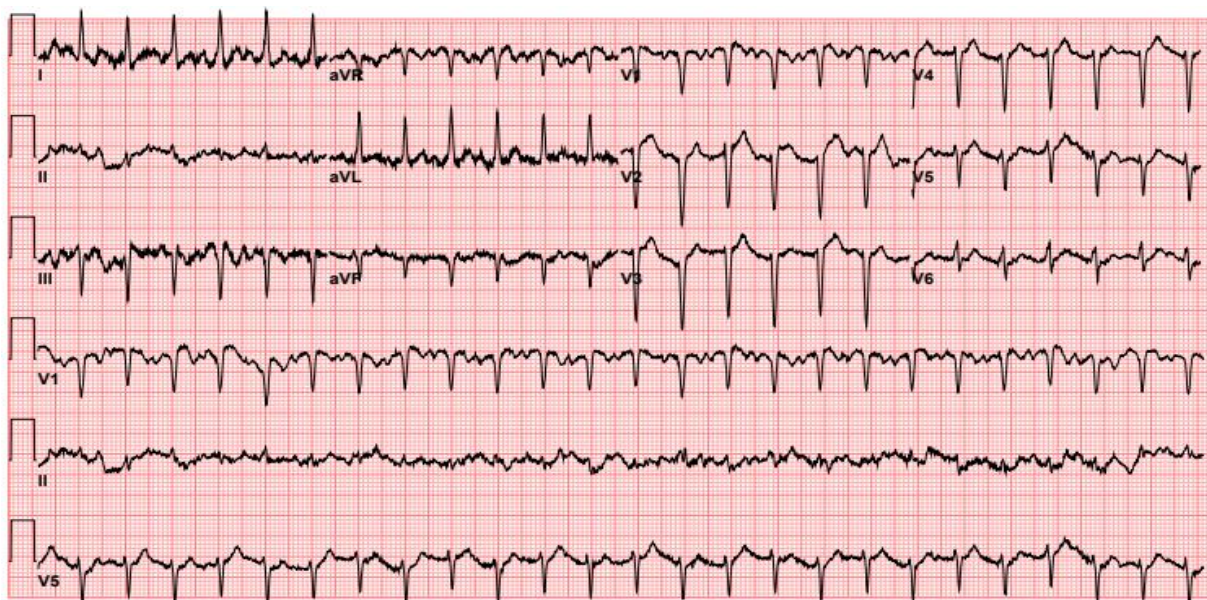



Patient #11

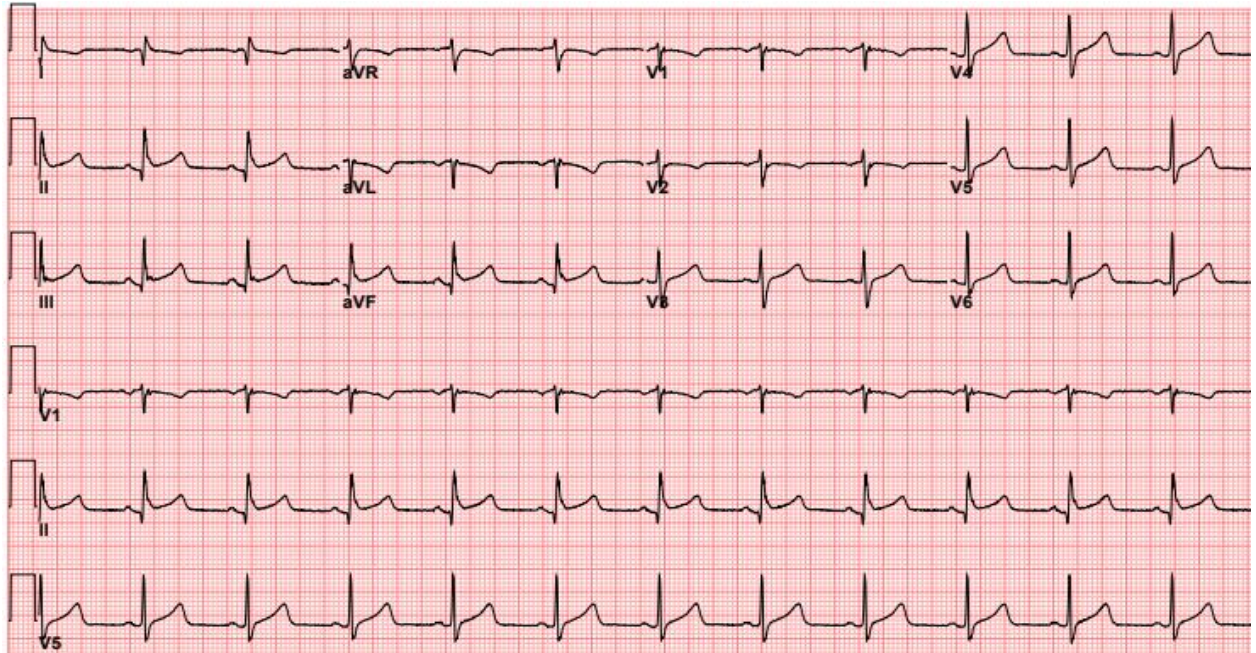

Patient #12

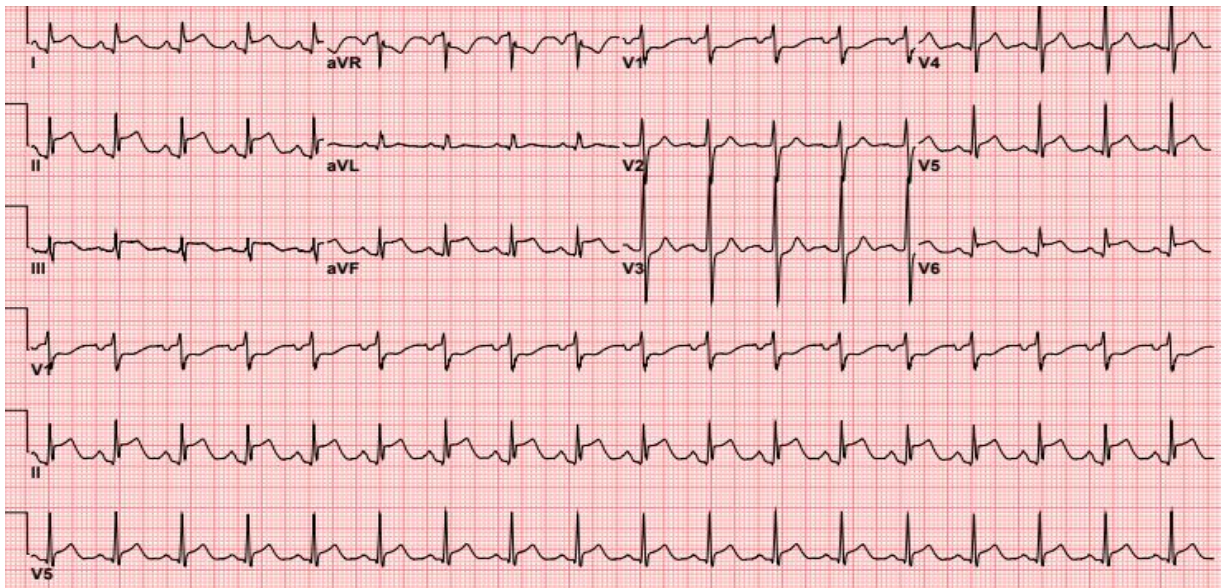



Patient #13

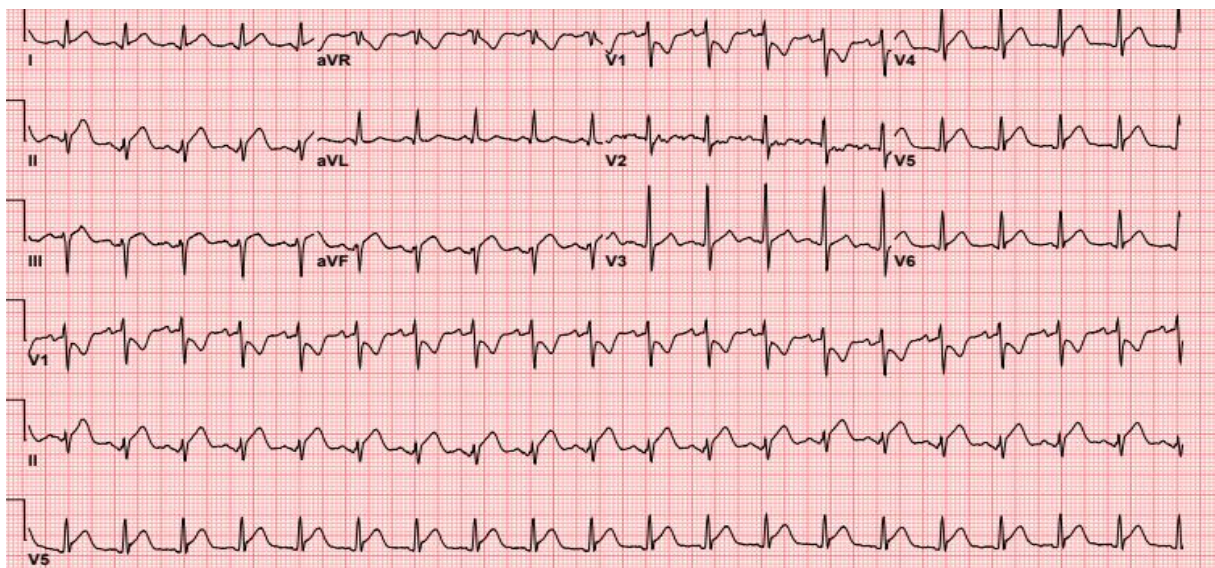

Patient #14

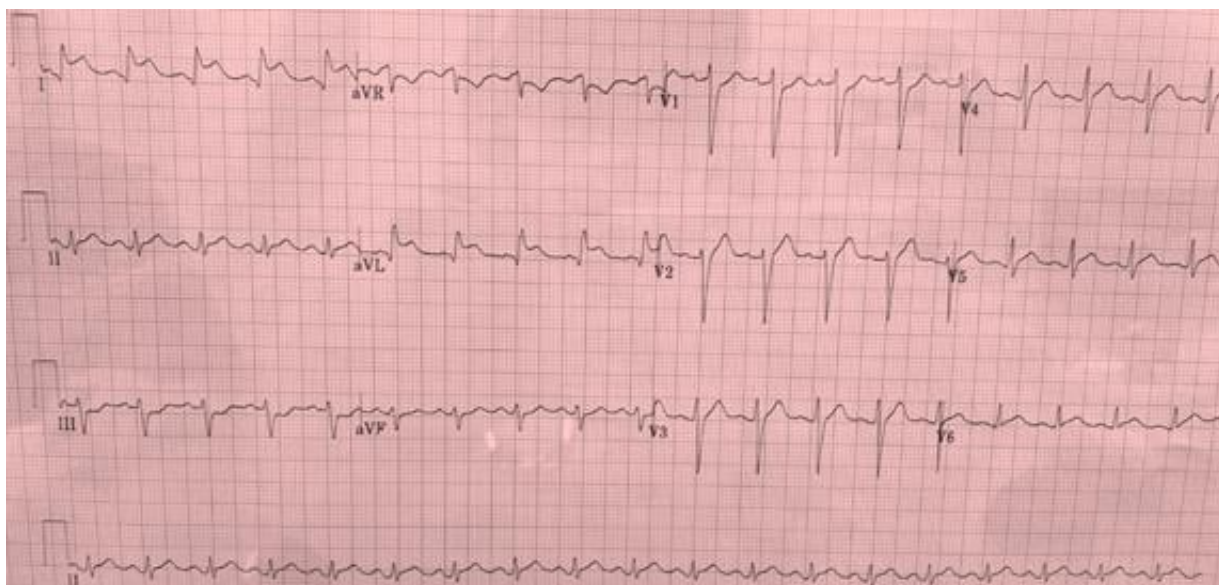



Patient #15

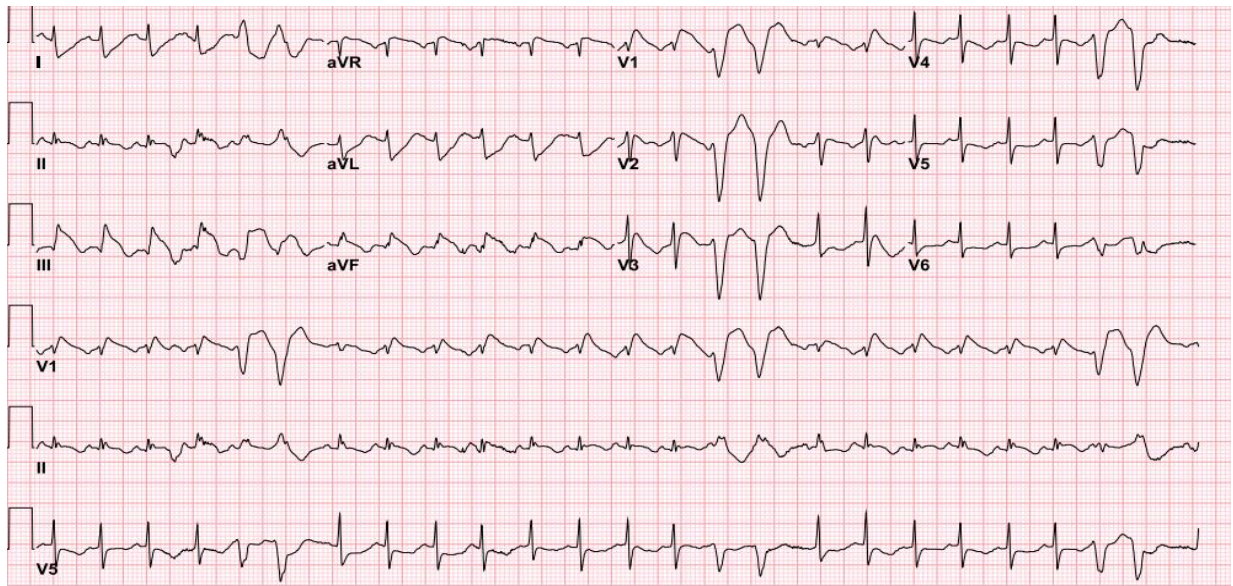

Patient #16

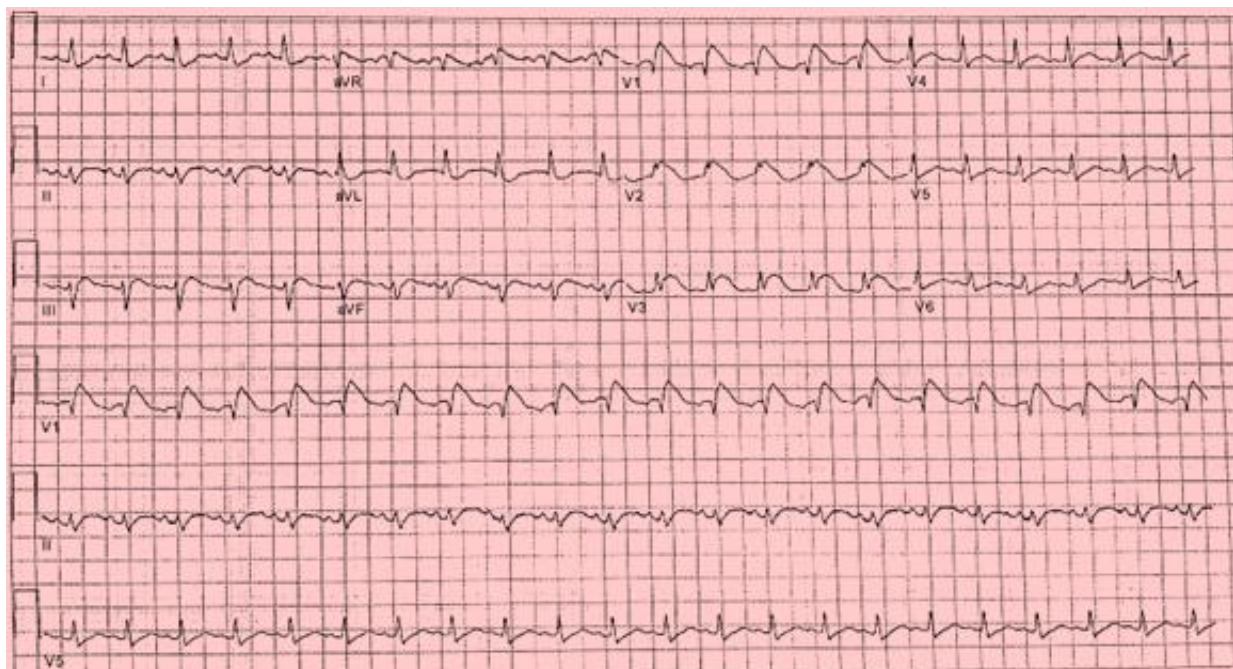



Patient #17

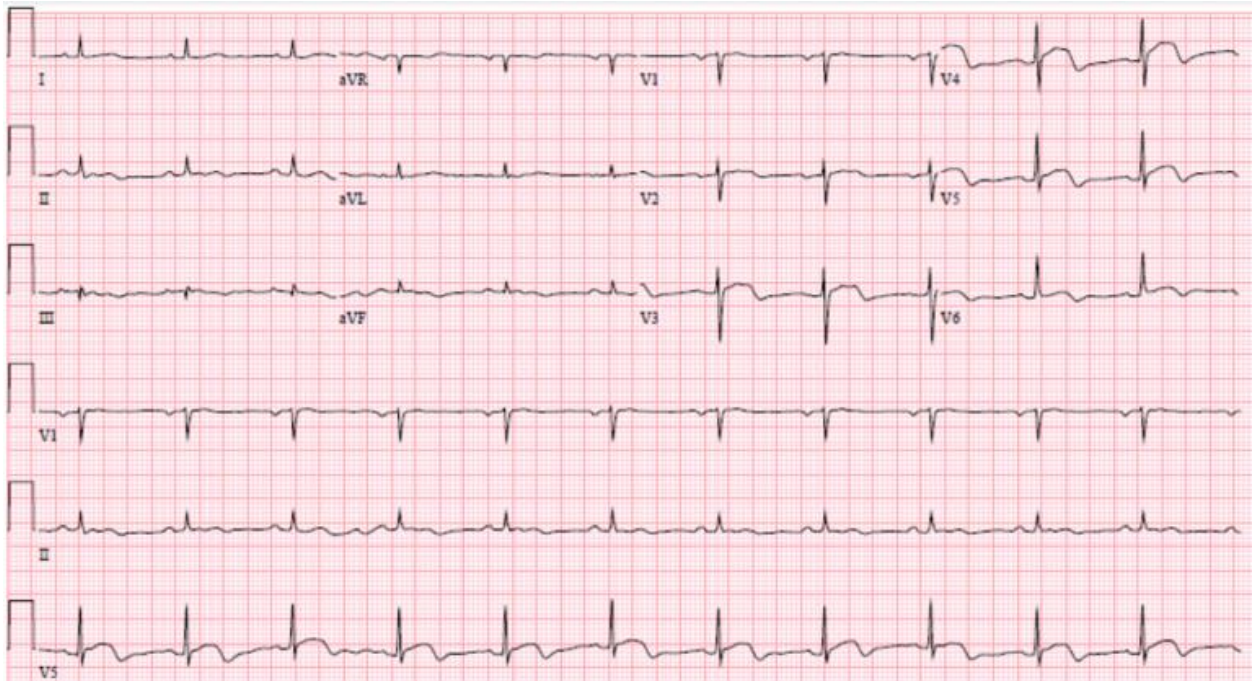

Patient #18

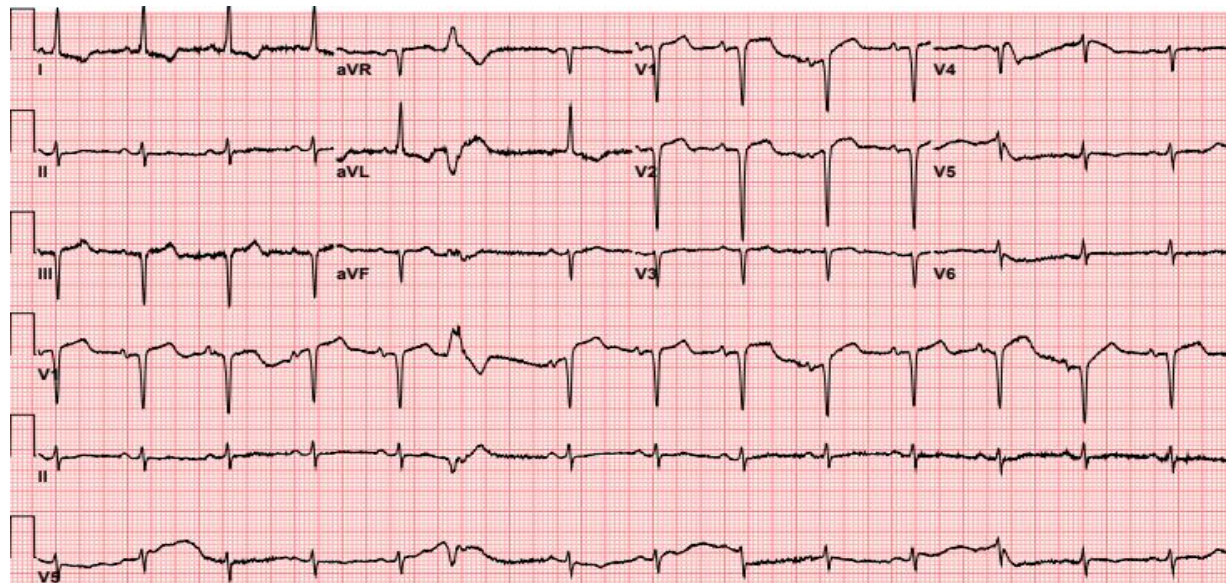

Figure S2A. Timing of ST-segment elevation, length of stay and outcome

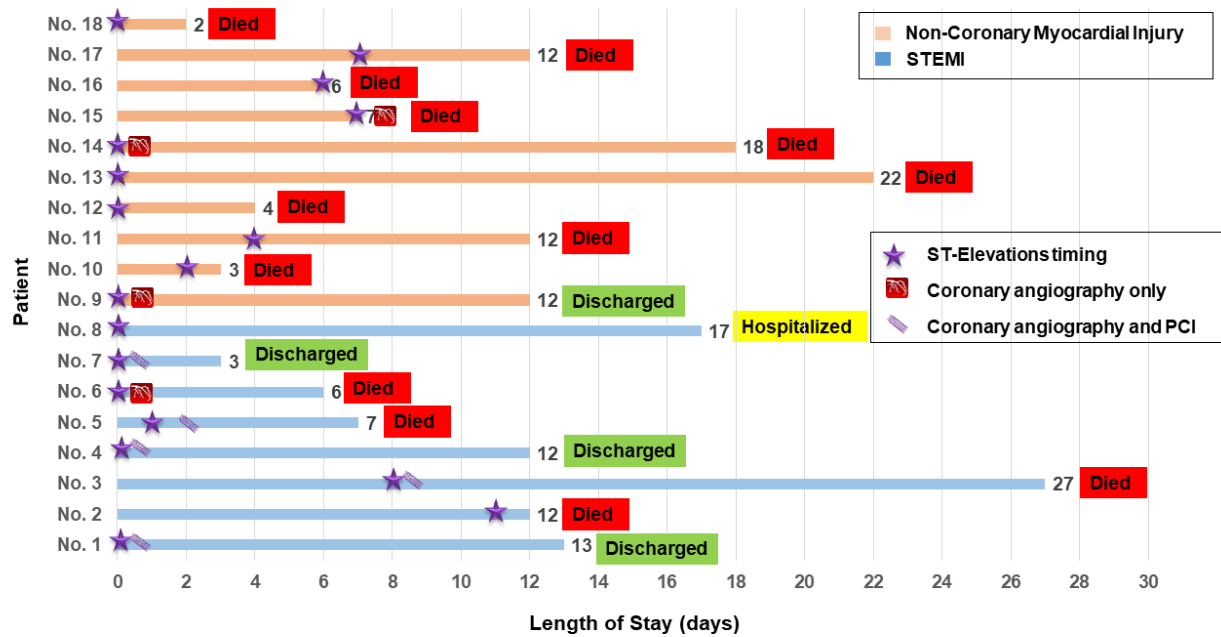

Please note, coronary angiography with or without PCI was at the time of ST-elevations (except patient 5). Patient #5 received thrombolytic therapy at the time of ST-segment elevation and underwent PCI a day later. Patient #6 had obstructive CAD with heavy thrombus burden which was managed with anticoagulation without PCI.



Figure S2B. Peak troponin levels

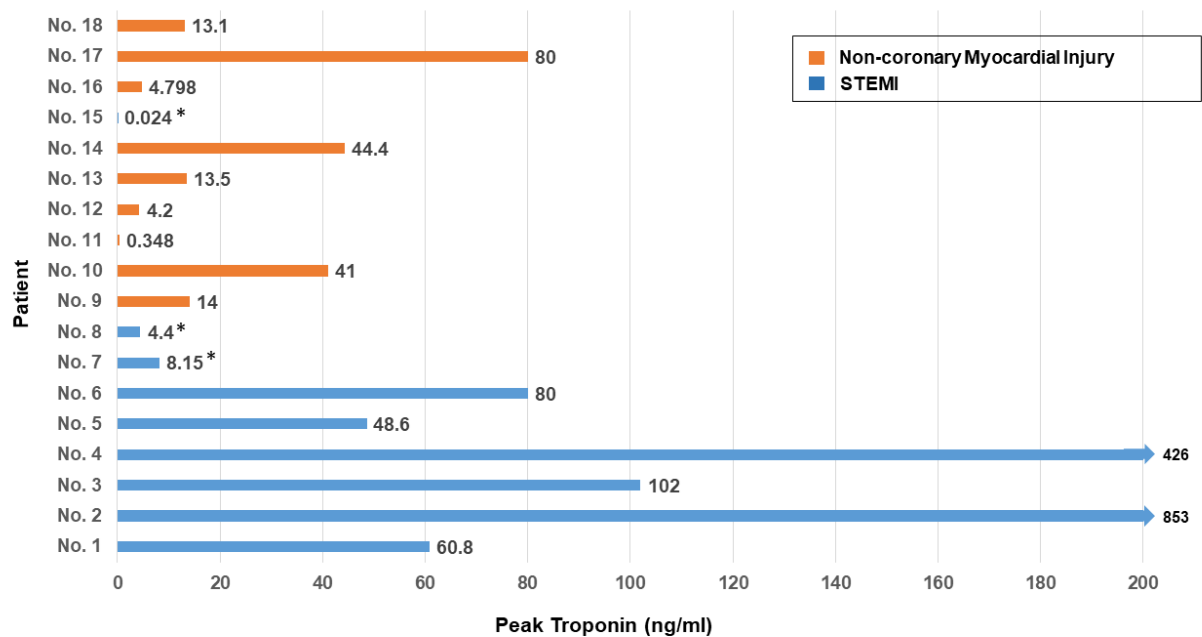

\*Troponin-T (ref ≤0.01 ng/ml). Rest of the assay were Troponin-I (ref ≤0.06 ng/ml)

Figure S2C. D-dimer levels

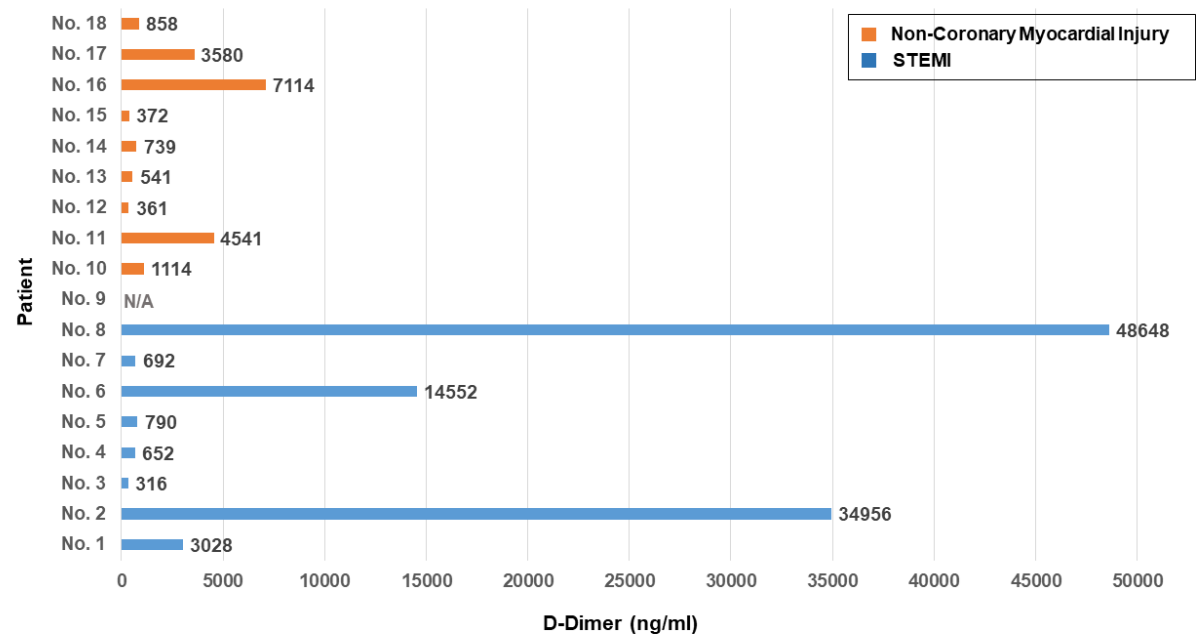



**Figure S3. Coronary angiography**

Patient #1

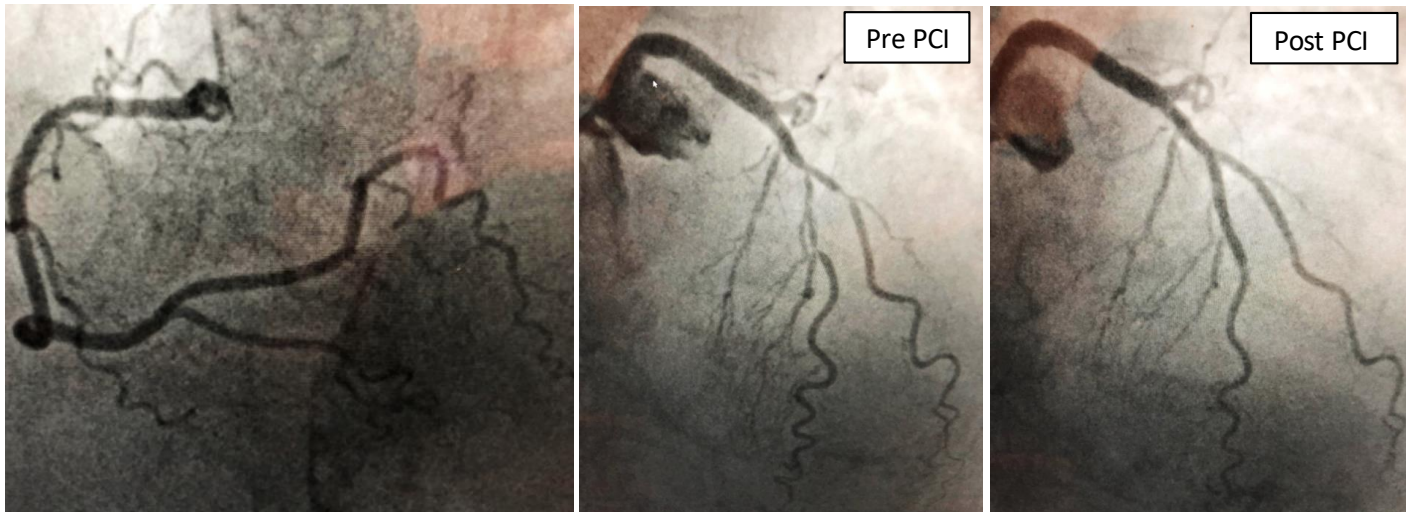

Patient #3

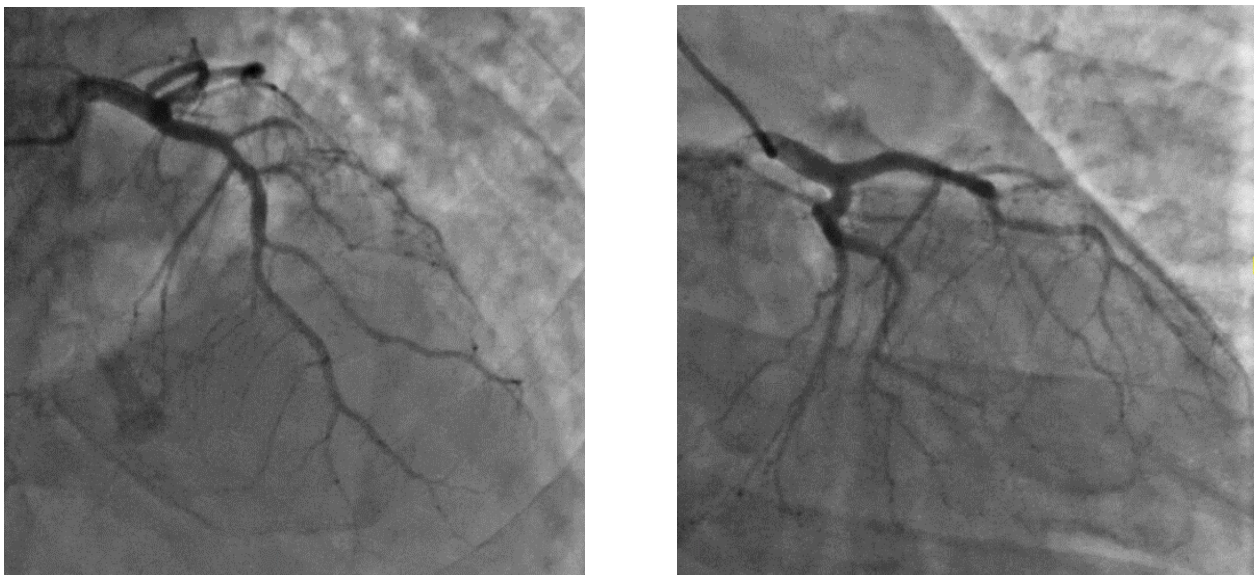

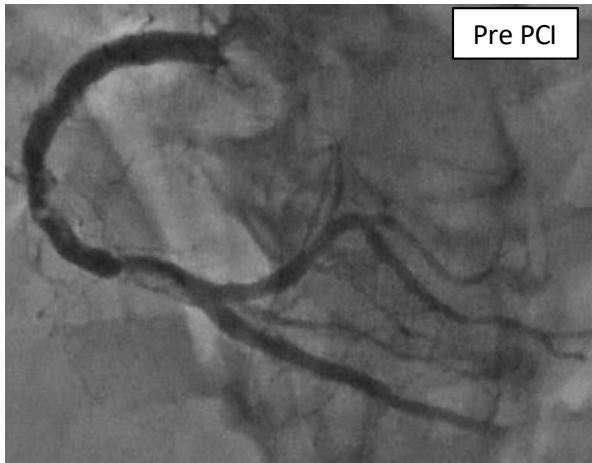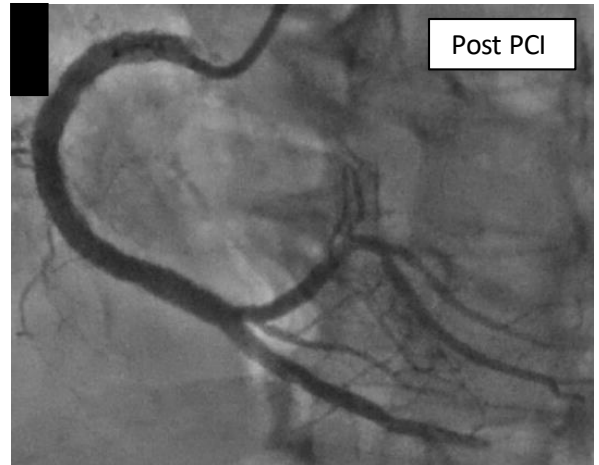

Patient #4

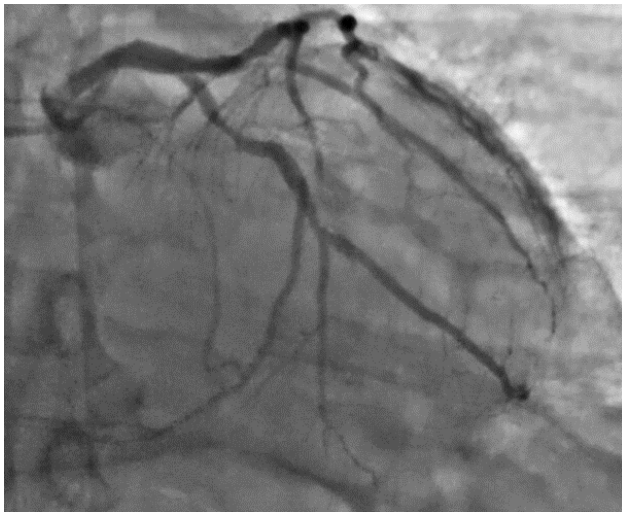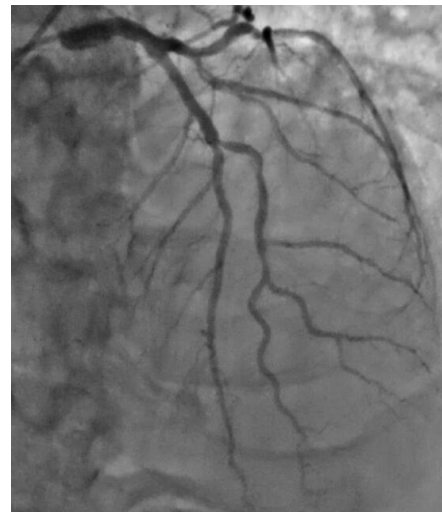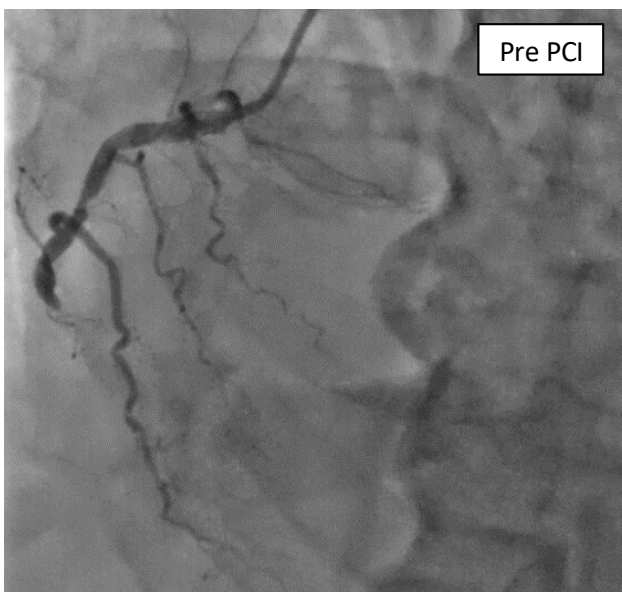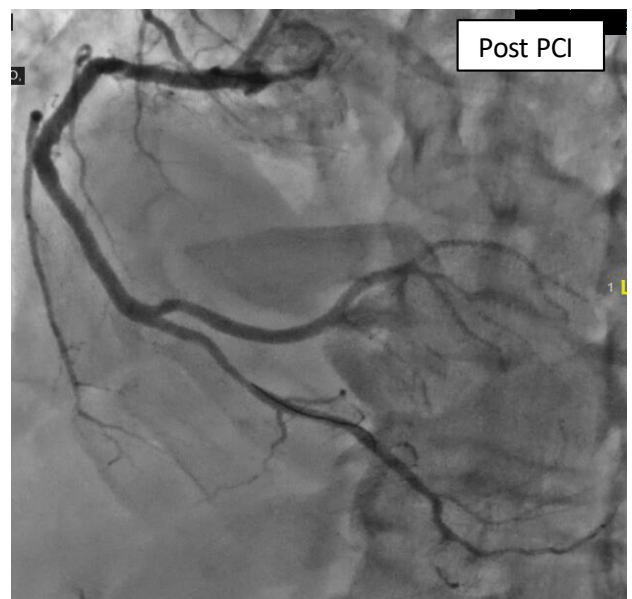

Patient #5

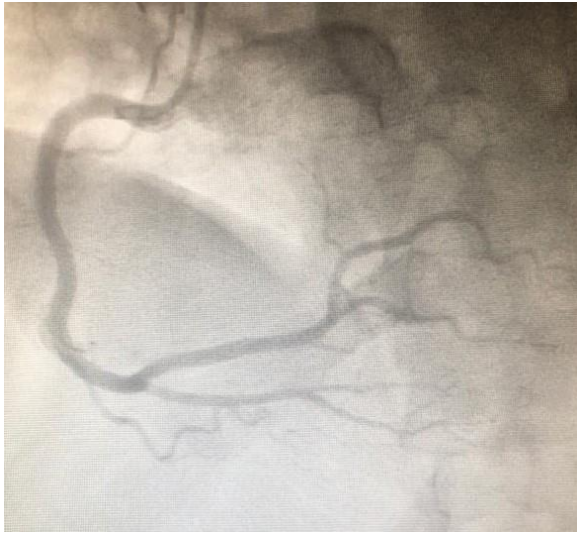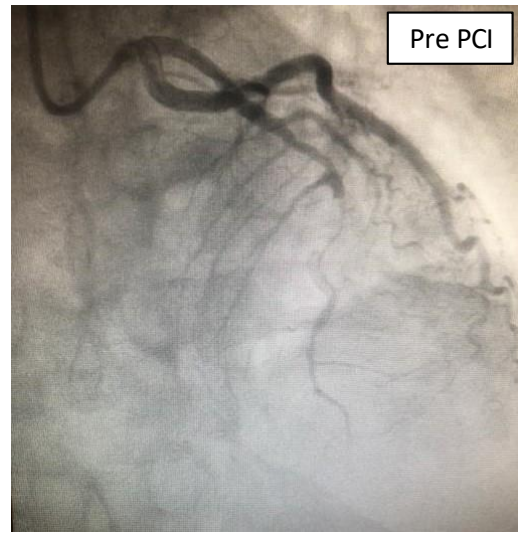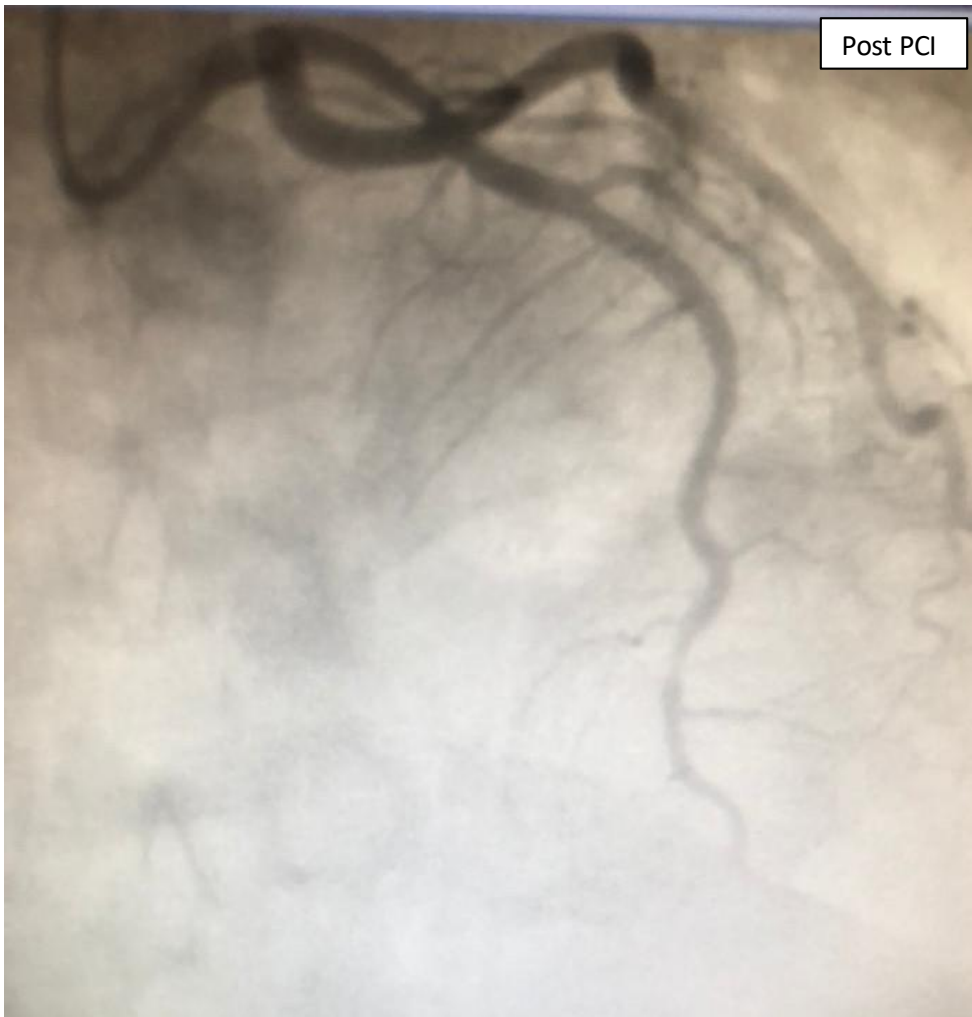



Patient #6

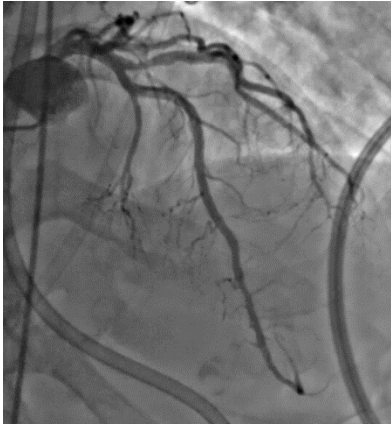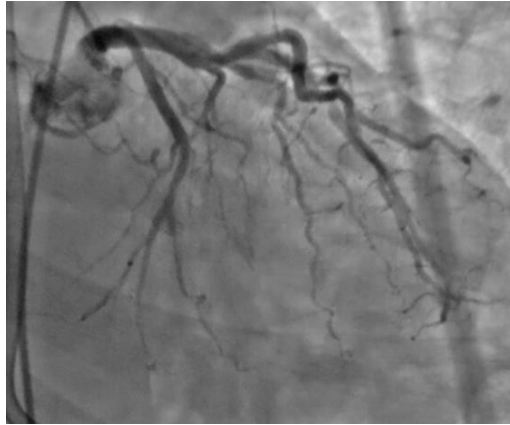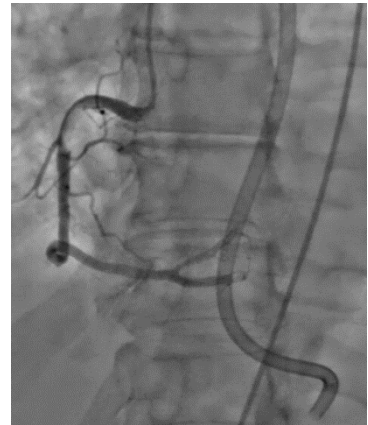

Patient #7

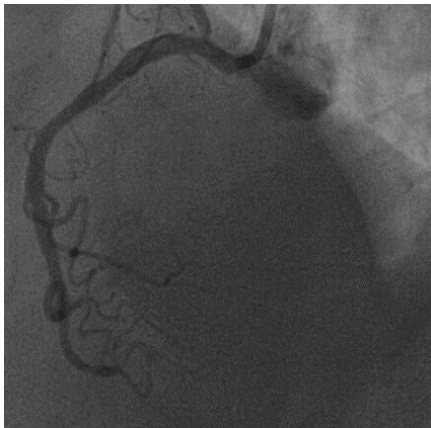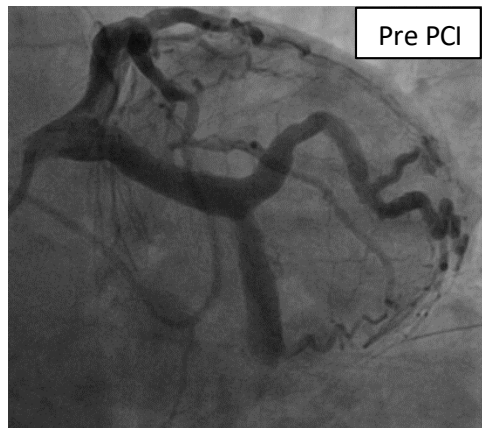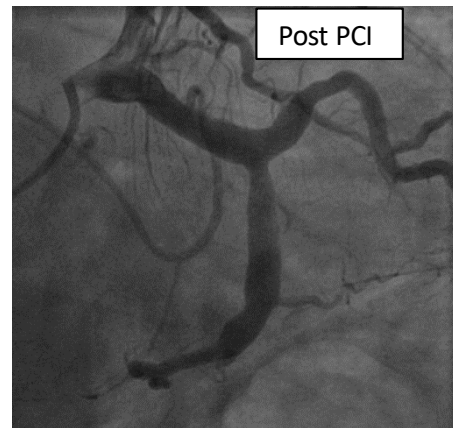

Patient #9

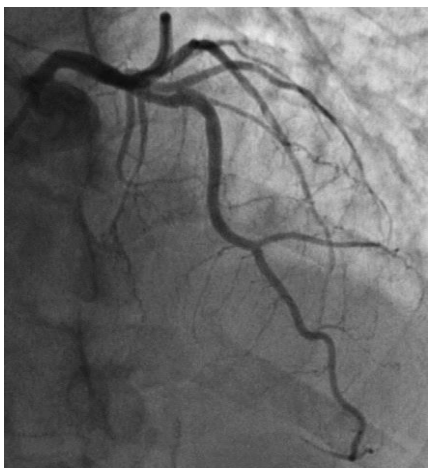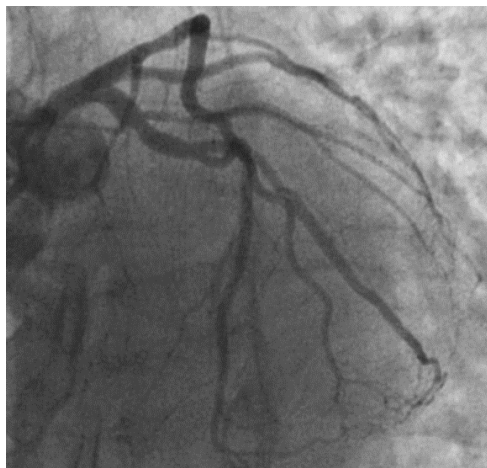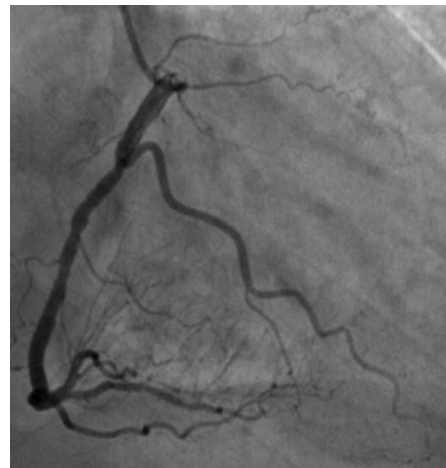

Patient #14

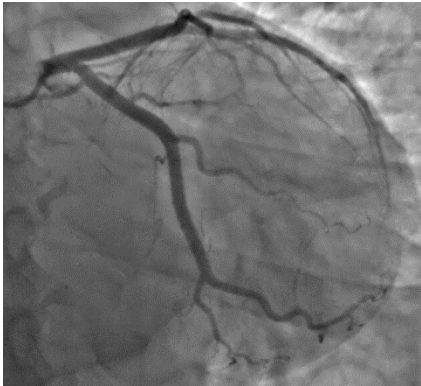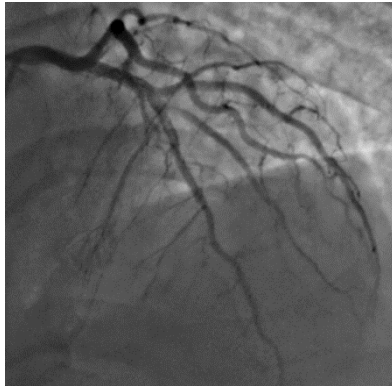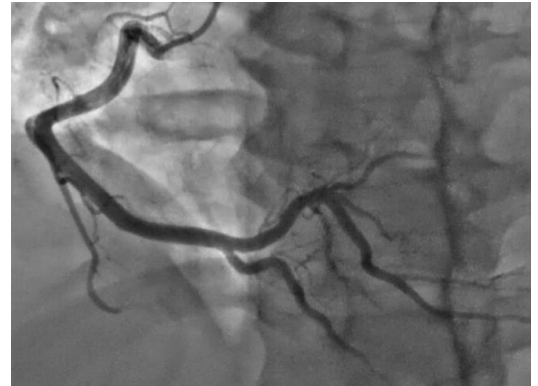

Patient #15

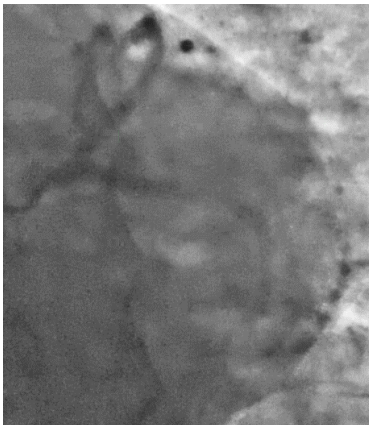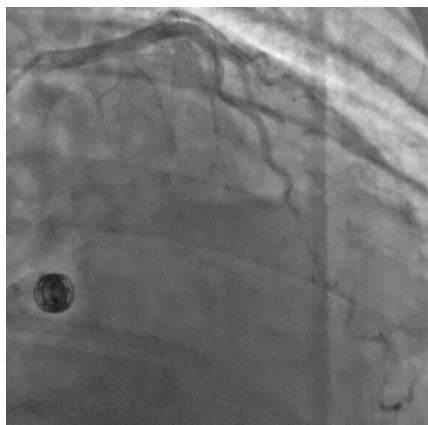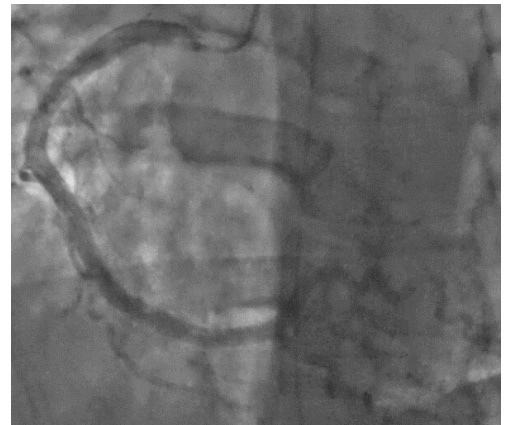

Figure S4. Electrocardiogram, echocardiogram and coronary angiography

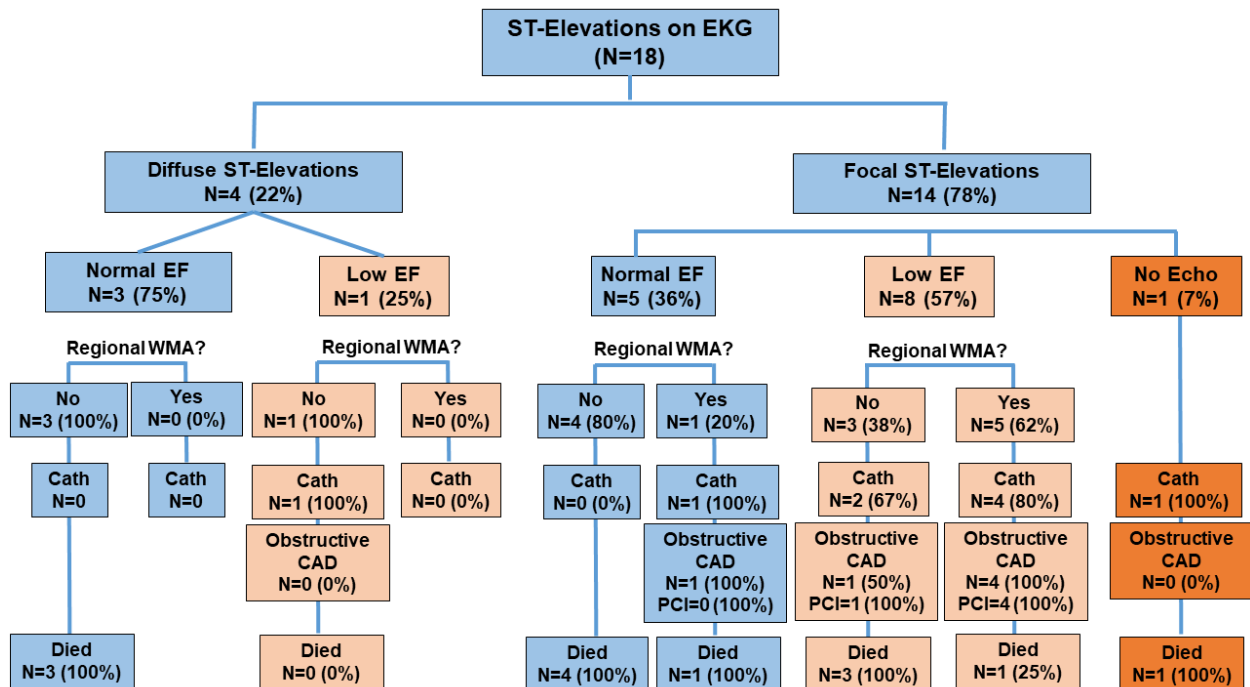

Supplement: nejmc2009020_appendix.pdf [file nejmc2009020_appendix.pdf]
